# Supplementary material for: External Stenting for Saphenous Vein Grafts in Coronary Surgery: A Systematic Review and Meta-Analysis
Source: MDPI journal article supplement (doi:10.3390/jcm12237395), 2023-11-29
Supplement: s1 [file s1]

## SUPPLEMENTAL MATERIAL

### TABLE OF CONTENTS

|                                                                                                                                               |           |
|-----------------------------------------------------------------------------------------------------------------------------------------------|-----------|
| <b>Supplemental Table 1.</b> Complete search strategy .....                                                                                   | <b>2</b>  |
| <b>Supplemental Table 2.</b> Study characteristics and patient data .....                                                                     | <b>3</b>  |
| <b>Supplemental Figure 1.</b> Traffic-light and summary plots for RCT quality assessment using the revised Cochrane risk-of-bias tool 2 ..... | <b>5</b>  |
| <b>Supplemental Figure 2.</b> Secondary analysis for the primary outcome of graft occlusion including VEST IV .....                           | <b>6</b>  |
| <b>Supplemental Figure 3.</b> Forest plot for Fitzgibbon patency class I .....                                                                | <b>7</b>  |
| <b>Supplemental Figure 4.</b> Forest plot for Fitzgibbon patency classes II-III .....                                                         | <b>8</b>  |
| <b>Supplemental Figure 5.</b> Forest plot for intimal hyperplasia area .....                                                                  | <b>9</b>  |
| <b>Supplemental Figure 6.</b> Forest plot for intimal-medial thickness .....                                                                  | <b>10</b> |

**Supplemental Table 1.** Complete search strategy**Ovid MEDLINE** (ALL – 1946 to present)

Searched on January 31, 2023

No language, article type, or publication date restrictions

| Line # | Search                                                                              |
|--------|-------------------------------------------------------------------------------------|
| 1      | Stents/ and external.tw.                                                            |
| 2      | (external adj4 (stent or stents or stenting or stented or support or supports)).tw. |
| 3      | 1 or 2                                                                              |
| 4      | Saphenous Vein/                                                                     |
| 5      | (Saphenous or SVG or saphena vein or saphenous venos system or vena saphena).tw.    |
| 6      | 4 or 5                                                                              |
| 7      | 3 and 6                                                                             |

**Ovid Embase** (1974 to present)

Searched on January 31, 2023

No language, article type, or publication date restrictions

| Line # | Search                                                                              |
|--------|-------------------------------------------------------------------------------------|
| 1      | Stents/ and external.tw.                                                            |
| 2      | (external adj4 (stent or stents or stenting or stented or support or supports)).tw. |
| 3      | 1 or 2                                                                              |
| 4      | Saphenous Vein/                                                                     |
| 5      | (Saphenous or SVG or saphena vein or saphenous venos system or vena saphena).tw.    |
| 6      | 4 or 5                                                                              |
| 7      | 3 and 6                                                                             |

**Cochrane Library** (Wiley)

Searched on January 31, 2023

No language, article type, or publication date restrictions

| ID | Search                                                                                  |
|----|-----------------------------------------------------------------------------------------|
| #1 | (external NEAR/4 (stent or stents or stenting or stented or support or supports)):ti,ab |
| #2 | (Saphenous or SVG or saphena vein or saphenous venos system or vena saphena):ti,ab      |
| #3 | #1 AND #2                                                                               |

**Supplemental Table 2.** Study characteristics and patient data

| <b>Trial</b>                   | <b>VEST III</b>          | <b>US VEST</b>                 | <b>Total</b>   |
|--------------------------------|--------------------------|--------------------------------|----------------|
| <b>Year of publication</b>     | 2022                     | 2022                           | -              |
| <b>Country</b>                 | Multicenter<br>(Europe)  | Multicenter<br>(North America) | -              |
| <b>Study period</b>            | October 2015<br>May 2019 | January 2018<br>February 2019  | -              |
| <b>Follow-up (years)</b>       | 2                        | 1                              | 1.5            |
| <b>Sample size</b>             | 183                      | 224                            | 407            |
| <b>Mean age (years)</b>        | 66.6±7.9                 | 65.8±8.3                       | 66.2±8.1       |
| <b>Female sex</b>              | 29/183 (15.8)            | 46/224 (20.5)                  | 75/407 (18.4)  |
| <b>Smoking habit*</b>          | 118/183 (64.5)           | 123/224 (54.9)                 | 241/407 (59.2) |
| <b>Diabetes</b>                | 54/183 (29.5)            | 114/224 (50.9)                 | 168/407 (41.3) |
| <b>Mean BMI</b>                | 28.6±4.4                 | 30.2±5.6                       | 29.4±5         |
| <b>Hypertension</b>            | 168/183 (91.8)           | 191/224 (85.3)                 | 359/407 (88.2) |
| <b>Hyperlipidemia</b>          | 164/183 (89.6)           | 188/224 (83.9)                 | 352/407 (86.5) |
| <b>COPD</b>                    | 23/183 (12.6)            | 16/224 (7.1)                   | 39 (9.6)       |
| <b>Vein varicosity</b>         |                          |                                |                |
| • <b>None</b>                  | 146/183 (79.8)           | 154/223 (69.1%)                | 300/406 (73.9) |
| • <b>Mild/moderate</b>         | 37/183 (20.2)            | 69/223 (30.9)                  | 106/406 (26.1) |
| <b>NYHA class ≥ III</b>        | 59/183 (32.2)            | 26/215 (12.1%)                 | 85/407 (21.3)  |
| <b>Prior MI</b>                | 58/183 (31.7)            | 93/224 (41.5%)                 | 151/407 (37.1) |
| <b>Prior PCI</b>               | 48/183 (26.2)            | 55/224 (24.6%)                 | 103/407 (25.3) |
| <b>Mean surgery time (min)</b> | 237.4±51.4               | 268.5±68.5                     | 252.9±59.9     |
| <b>Mean XC time (min)</b>      | 60.4±21.1                | 83±25.8                        | 71.7±23.4      |
| <b>Mean CPB time (min)</b>     | 97.7±26.8                | 110.5±35.1                     | 104.1±30.9     |
| <b>SVG harvesting method</b>   |                          |                                |                |
| • <b>Open</b>                  | 118/183 (64.5)           | 41/224 (18.3)                  | 159/407 (39.1) |
| • <b>Endoscopic</b>            | 57/183 (31.1)            | 169/224 (75.4)                 | 226/407 (55.5) |
| • <b>Other</b>                 | 8/183 (4.4)              | 14/224 (6.3)                   | 22/407 (5.4)   |

| <b>Trial</b>                                      | <b>VEST III</b> | <b>US VEST</b> | <b>Total</b>   |
|---------------------------------------------------|-----------------|----------------|----------------|
| <b>N° grafts per patient</b>                      |                 |                |                |
| • 3                                               | 138/183 (75.4)  | 137/224 (61.2) | 275/407 (67.6) |
| • 4                                               | 42/183 (22.9)   | 72/224 (32.1)  | 114/407 (28.0) |
| • 5                                               | 3/183 (1.7)     | 14/224 (6.3)   | 17/407 (4.2)   |
| • 6                                               | 0/183 (0)       | 0/224 (0)      | 0/407 (0)      |
| • 7                                               | 0/183 (0)       | 1/224 (0.4)    | 1/407 (0.2)    |
| <b>N° SVGs deployed</b>                           | 366 (100)       | 447 (100)      | 813 (100)      |
| • VEST-SVGs                                       | 183/366 (50)    | 223/447 (50)   | 406/813 (50)   |
| • Control                                         | 183/366 (50)    | 224/447 (50)   | 407/813 (50)   |
| <b>N° of patients with angiographic follow-up</b> | 128/183 (69.9)  | 203/224 (90.6) | 331/407 (81.3) |
| <b>N° SVGs analyzed</b>                           | 273/366 (74.6)  | 406/447 (90.8) | 679/813 (83.5) |
| • VEST-SVGs                                       | 138/273 (50.5)  | 203/406 (50)   | 341/679 (50.2) |
| • Control                                         | 135/273 (49.5)  | 203/406 (50)   | 338/679 (49.8) |
| <b>Graft occlusion</b>                            | 54/273 (19.8)   | 92/406 (22.7)  | 146 (21.5)     |
| • VEST-SVGs                                       | 30/54 (55.5)    | 47/92 (51.1)   | 77 (52.7)      |
| • Control                                         | 24/54 (45.5)    | 45/92 (48.9)   | 69 (47.3)      |
| <b>Repeat revascularization</b>                   | 11/183 (6.0)    | 9/224 (4.0)    | 20/407 (4.9)   |
| • VEST-SVGs                                       | 4/11 (36.4)     | 4/9 (44.4)     | 8/20 (40.0)    |
| • Control                                         | 7/11 (63.6)     | 5/9 (55.6)     | 12/20 (60.0)   |

\*Current and former. Numbers are presented as counts (percentages) or mean±standard deviation. BMI: body mass index; CPB: cardiopulmonary bypass; COPD: chronic obstructive pulmonary disease; MI: myocardial infarction; NYHA: New York Heart Association; PCI: percutaneous coronary intervention; SVG: saphenous vein graft; VEST: venous external support trial; XC: cross-clamp.

**Supplemental Figure 1.** Traffic-light (A) and summary plots (B) for RCT quality assessment using the revised Cochrane risk-of-bias tool 2

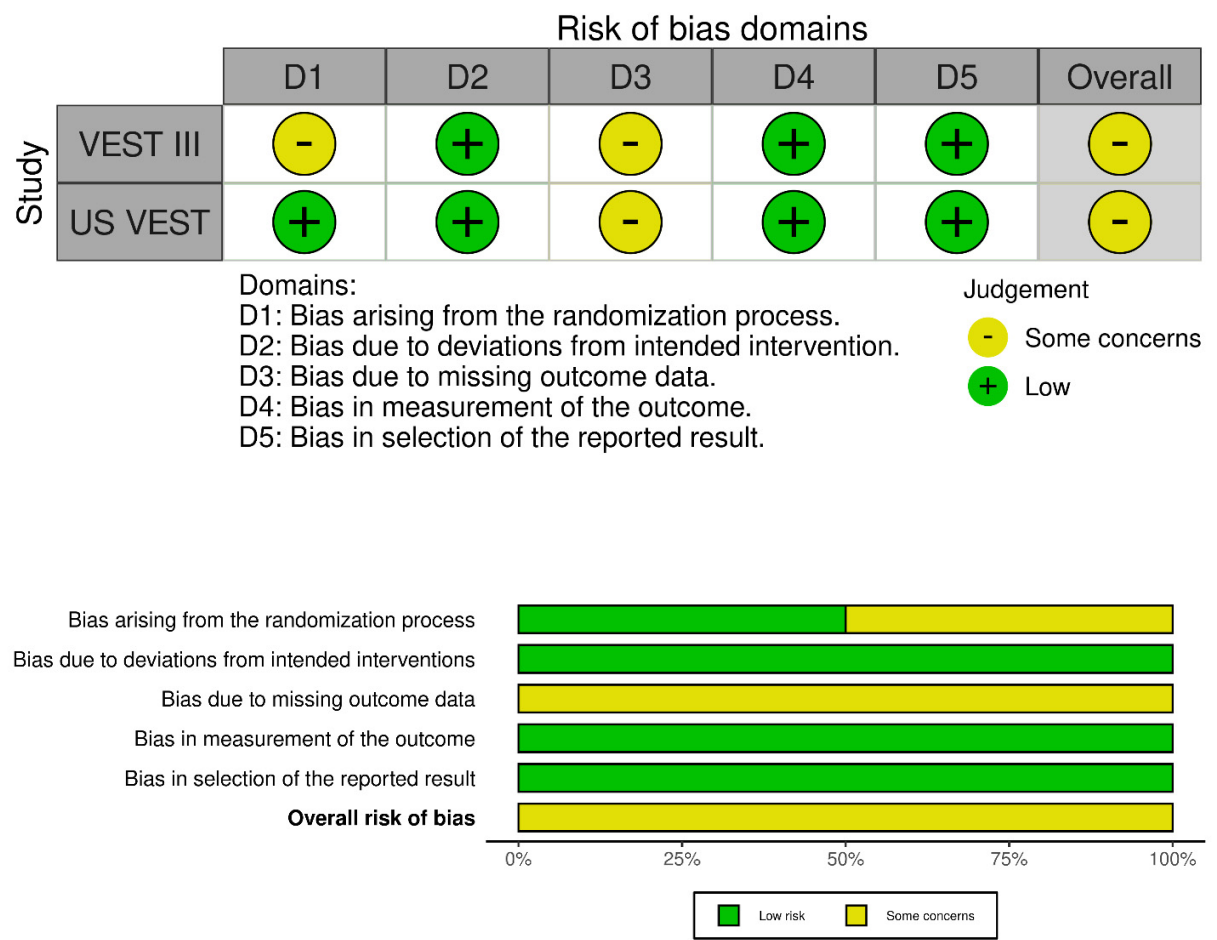

VEST: venous external support trial.

**Supplemental Figure 2.** Secondary analysis for the primary outcome of graft occlusion including VEST IV\*

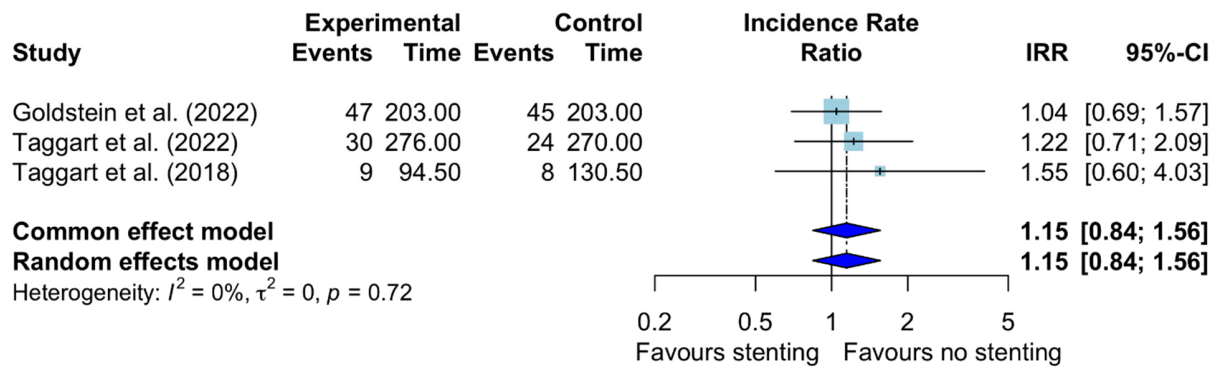

\* Taggart et al. (2018). CI: confidence interval; IRR: incidence rate ratio; VEST: venous external support trial.

**Supplemental Figure 3.** Forest plot for Fitzgibbon patency class I

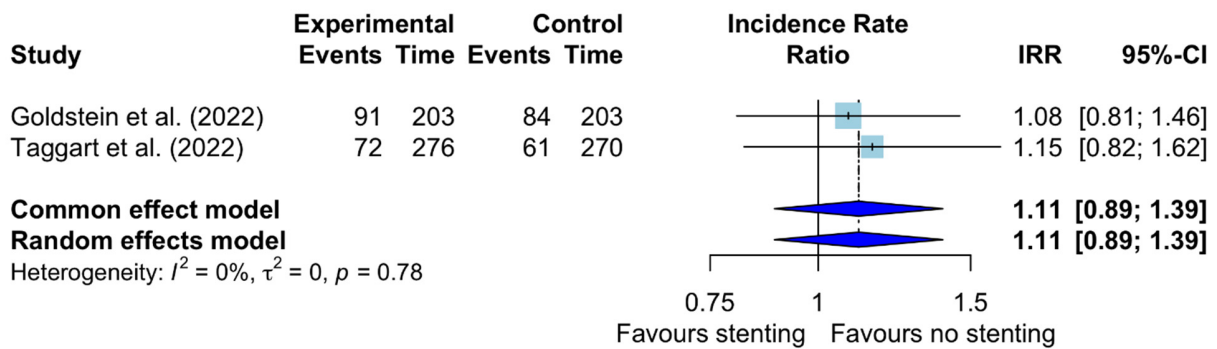

CI: confidence interval; IRR: incidence rate ratio.

**Supplemental Figure 4.** Forest plot for Fitzgibbon patency classes II-III

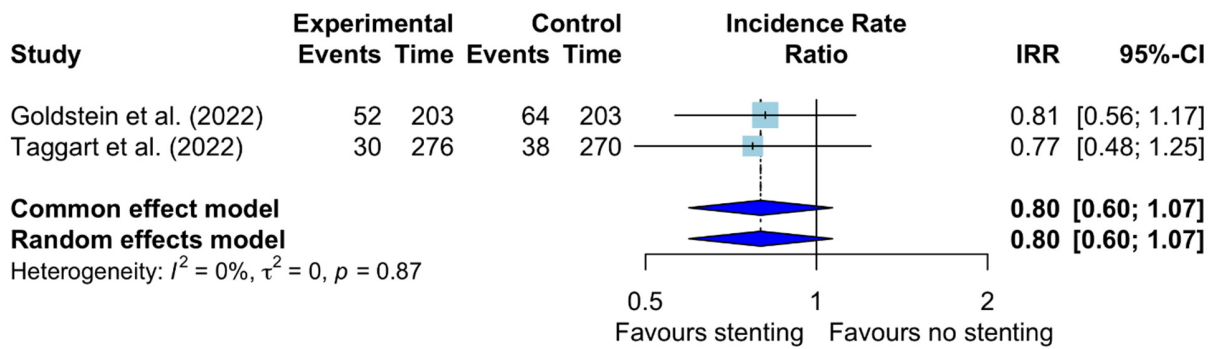

CI: confidence interval; IRR: incidence rate ratio.



**Supplemental Figure 5.** Forest plot for intimal hyperplasia area

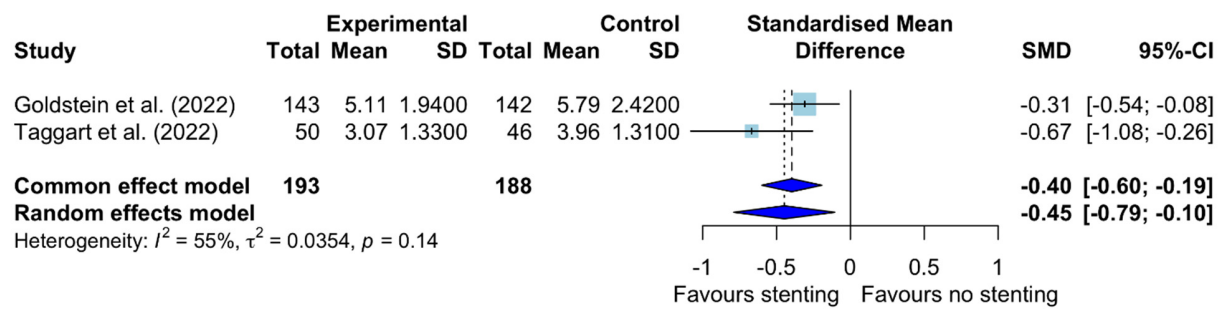

CI: confidence interval; SD: standard deviation; SMD: standardized mean difference.

**Supplemental Figure 6.** Forest plot for intimal-medial thickness

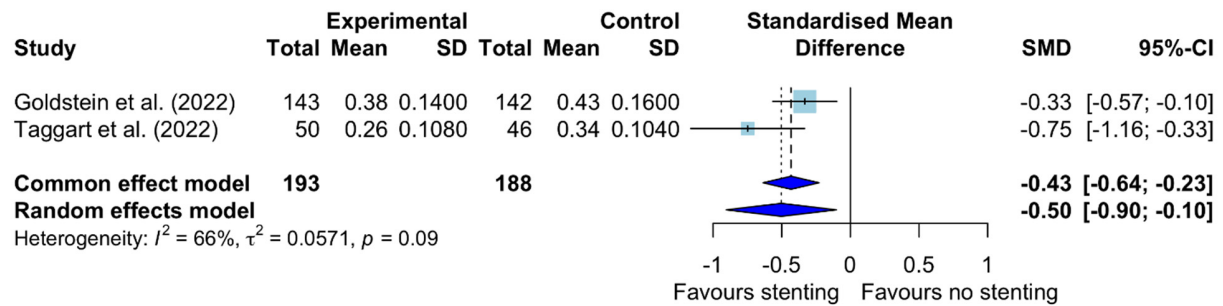

CI: confidence interval; SD: standard deviation; SMD: standardized mean difference.
